# Supplementary material for: Exploring thiophene-2-acetate and thiophene-3-acetate binding modes towards the molecular and supramolecular structures and photoluminescence properties of Pb(ii) polymers
Source: Royal Society of Chemistry journal article supplement (doi:10.1039/d0ce01224f), 2020-01-01
Supplement: d0ce01224f2.pdf [file d0ce01224f2.pdf]

This document certifies that the manuscript

**Exploring thiophene-2-acetate and thiophene-3-acetate binding modes towards the molecular, supramolecular structures and photoluminescence properties of Pb(II) polymers**

prepared by the authors

**Mateusz Kowalik, Joanna Masternak, Katarzyna Kazimierczuk, Bogumiła Kupcewicz, Oleksiy V. Khavryuchenko, Barbara Barszcz**

was edited for proper English language, grammar, punctuation, spelling, and overall style by one or more of the highly qualified native English speaking editors at AJE.

This certificate was issued on **June 4, 2020** and may be verified on the [AJE website](#) using the verification code **E470-3B01-634F-F694-1173**.

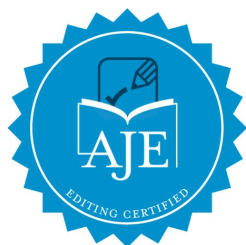

Neither the research content nor the authors' intentions were altered in any way during the editing process. Documents receiving this certification should be English-ready for publication; however, the author has the ability to accept or reject our suggestions and changes. To verify the final AJE edited version, please visit our verification page at [aje.com/certificate](http://aje.com/certificate). If you have any questions or concerns about this edited document, please contact AJE at [support@aje.com](mailto:support@aje.com).
